# Supplementary material for: The evolution and genetic diversity of avian influenza A(H9N2) viruses in Cambodia, 2015 – 2016
Source: PubMed Central journal article supplement (PMC6901181; doi:10.1371/journal.pone.0225428), 2019-12-09

# S2a) HA

## Key

- Cambodian 2013
- Cambodian 2015
- Cambodian 2016

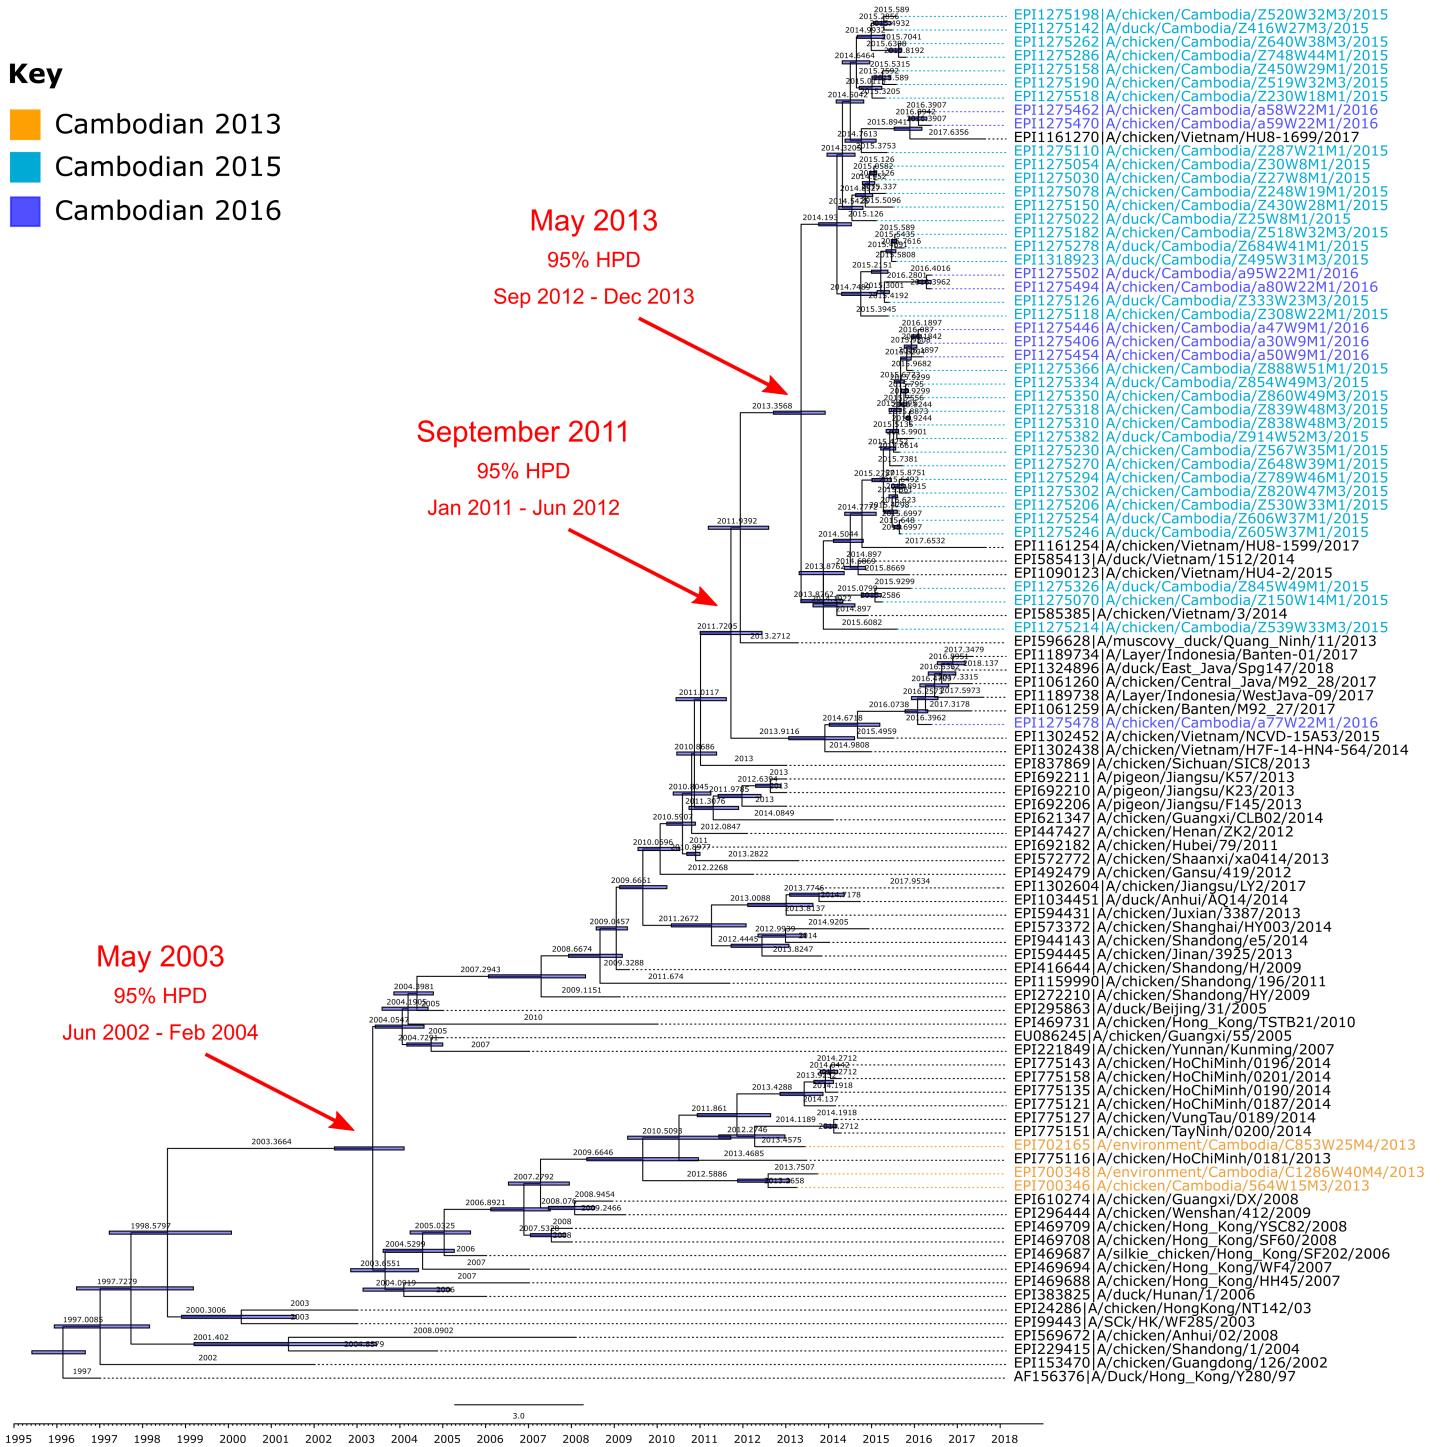

# S2b) NA

## Key

- Cambodian 2013
- Cambodian 2015
- Cambodian 2016

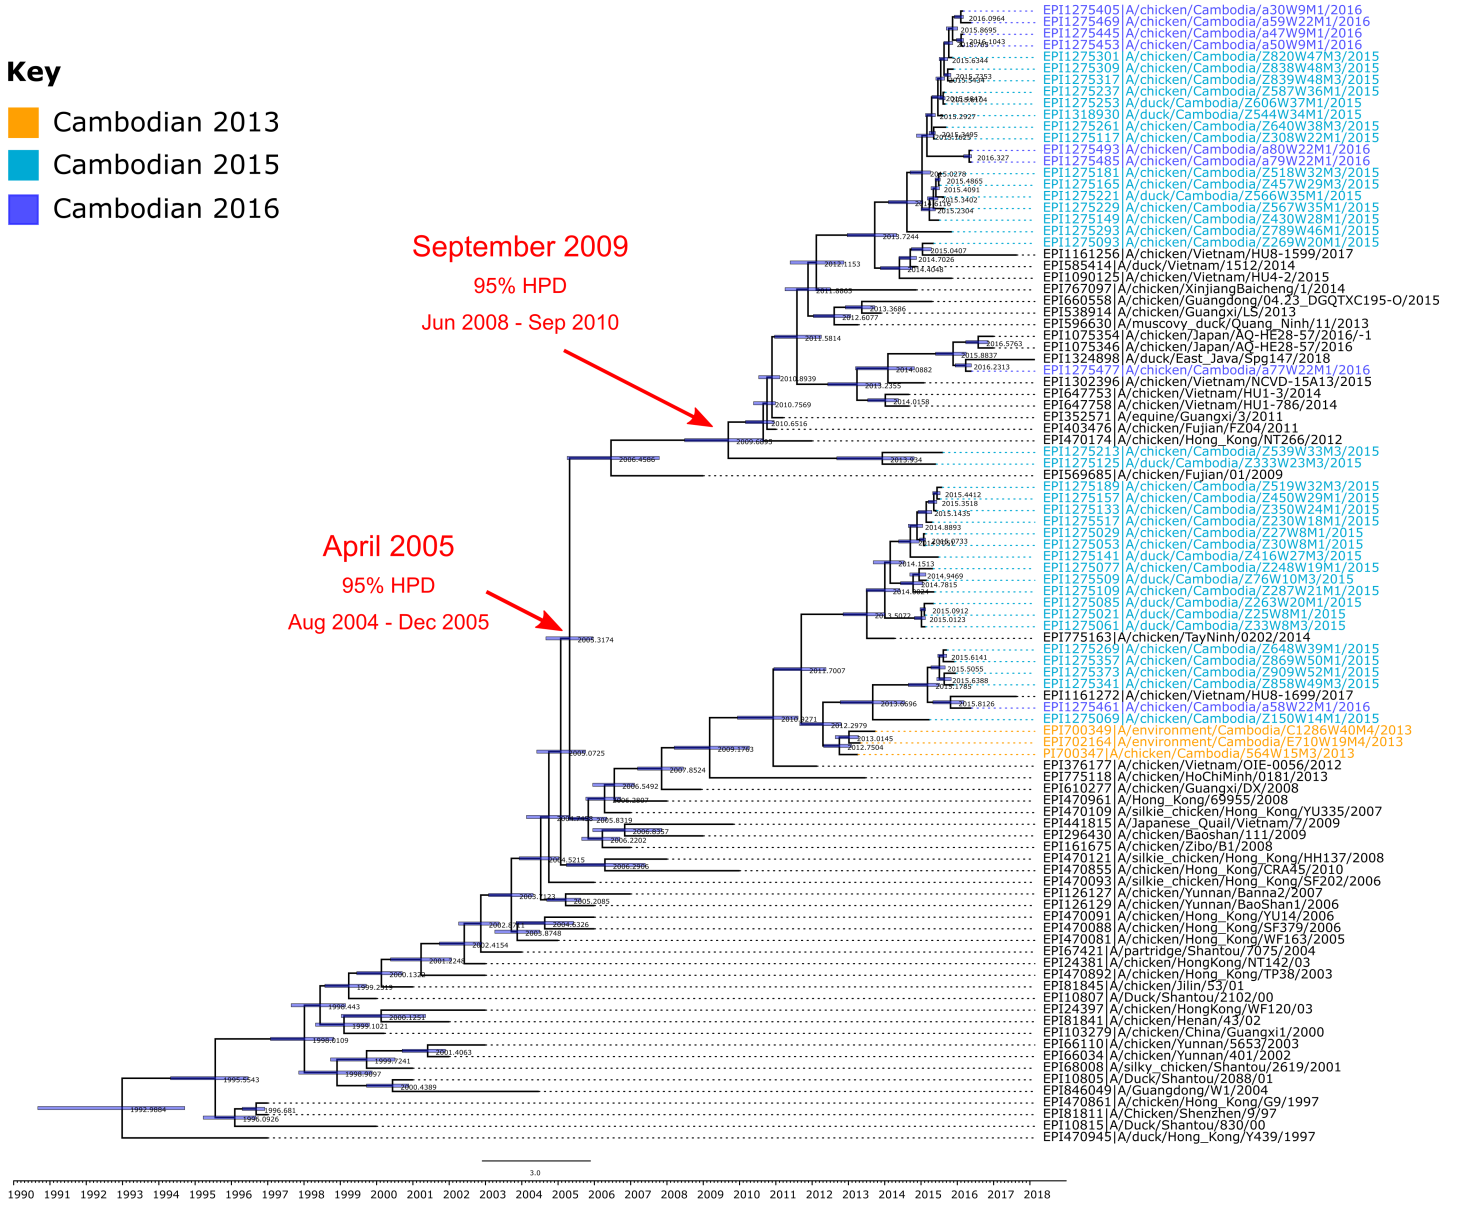

Supplement: pone.0225428.s002.pdf [file pone.0225428.s002.pdf]
