# Supplementary material for: The evolution and genetic diversity of avian influenza A(H9N2) viruses in Cambodia, 2015 – 2016
Source: PubMed Central journal article supplement (PMC6901181; doi:10.1371/journal.pone.0225428), 2019-12-09
Supplement: pone.0225428.s004.pdf [file pone.0225428.s004.pdf]

# S4a) PB2

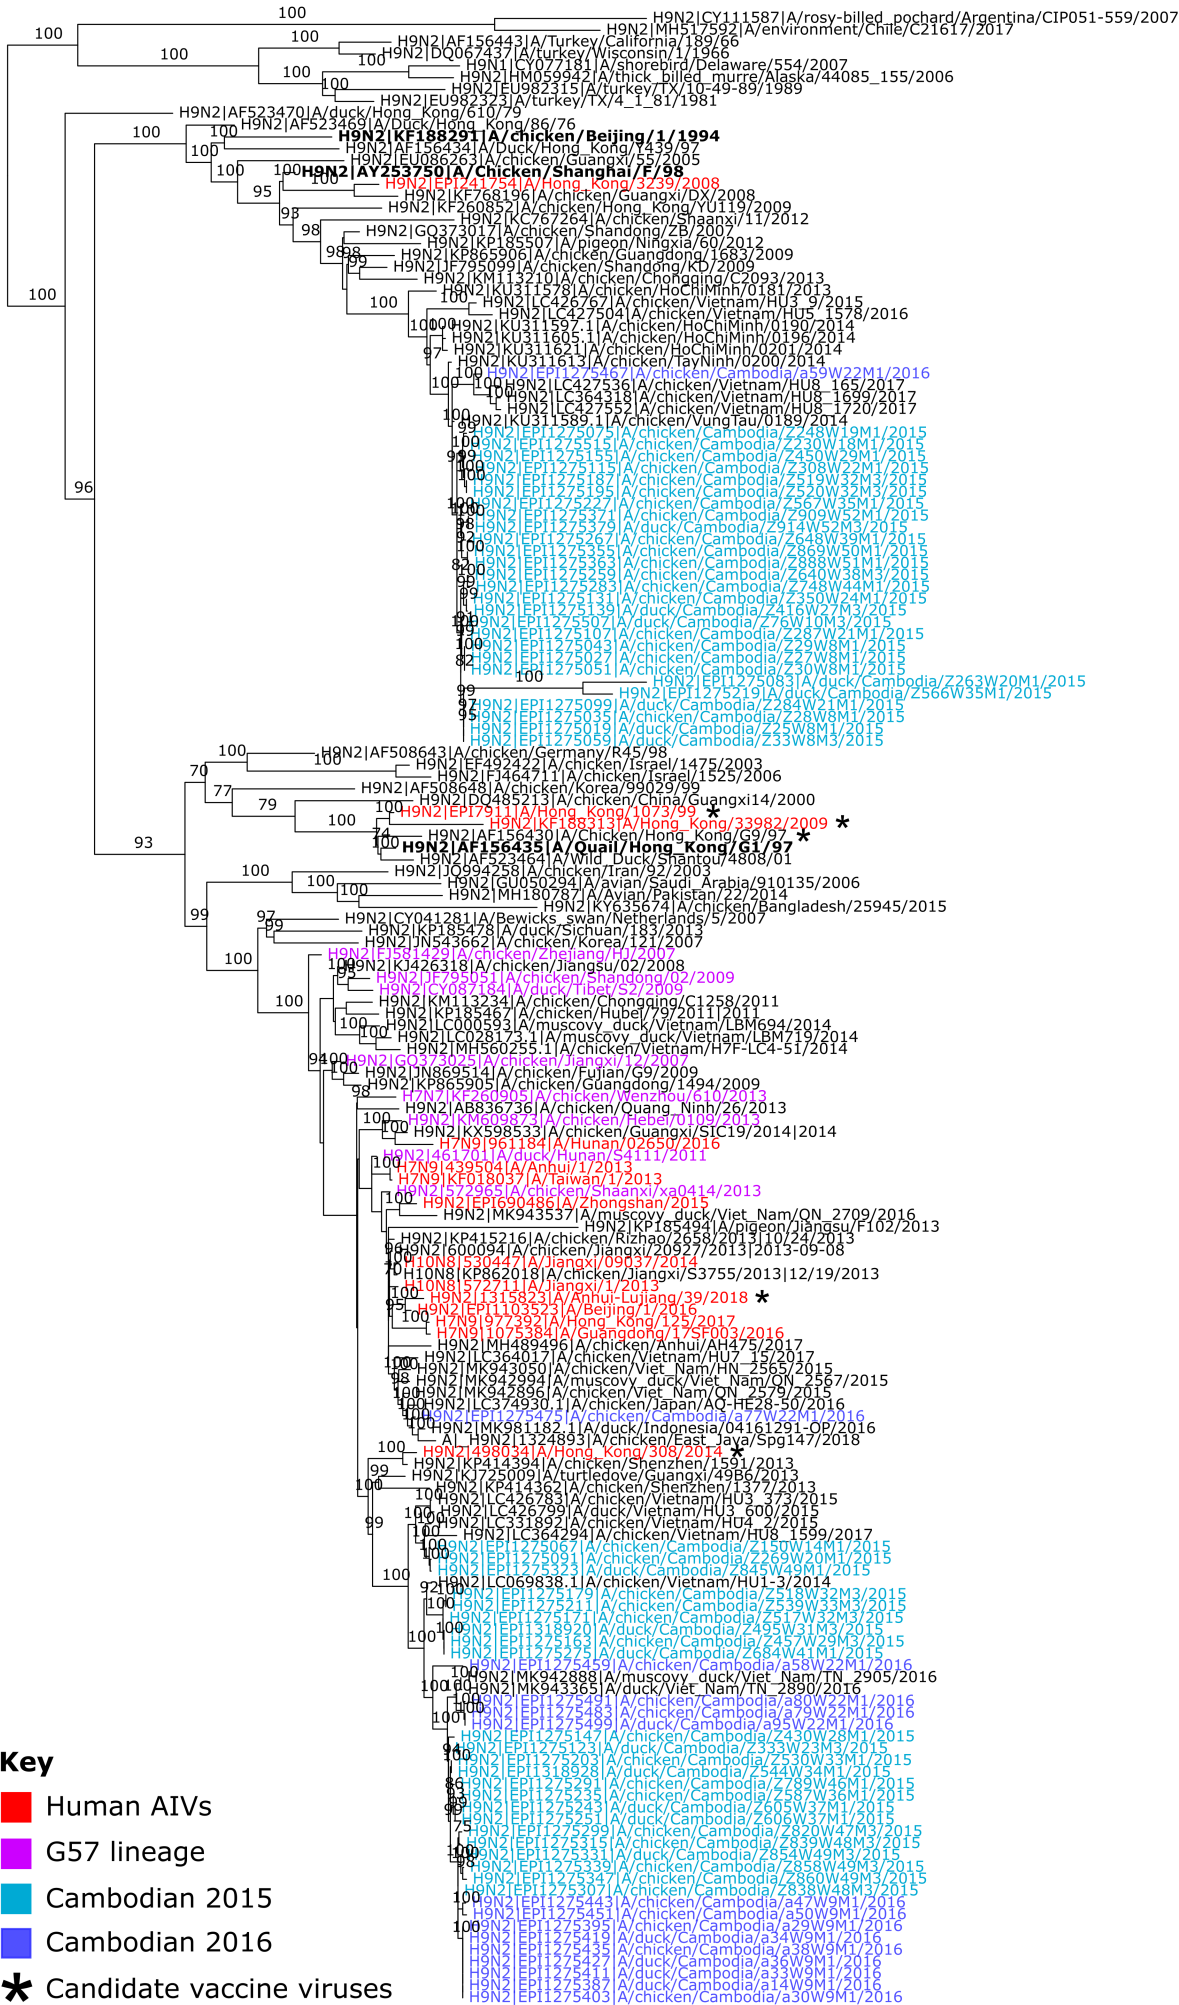

F/98

G1/97

- Key**
- Human AIVs
  - G57 lineage
  - Cambodian 2015
  - Cambodian 2016
  - ★ Candidate vaccine viruses

# S4b) PB1

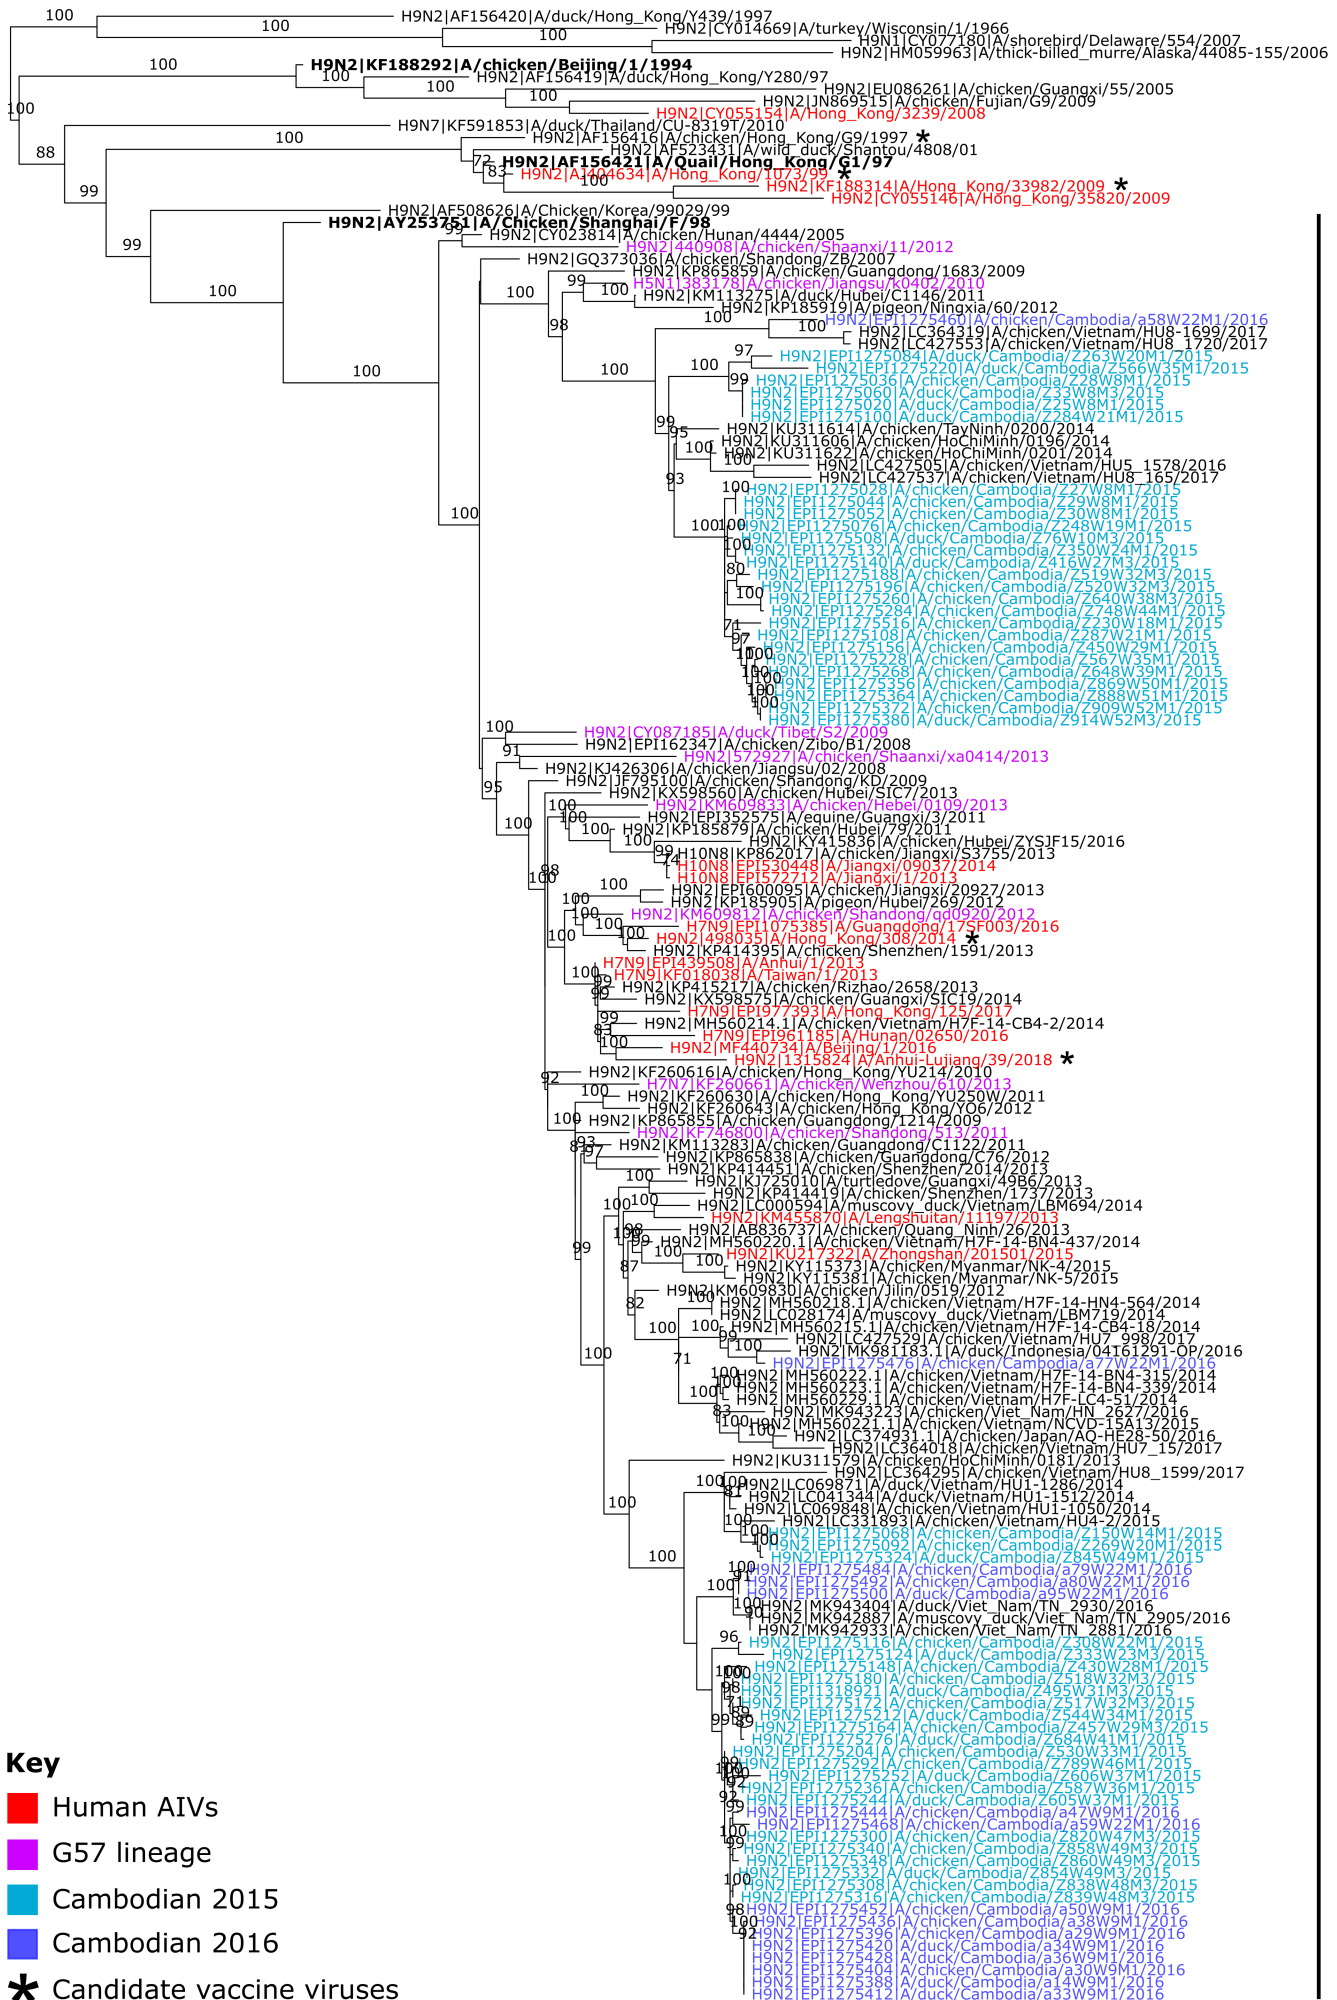



# S4c) PA

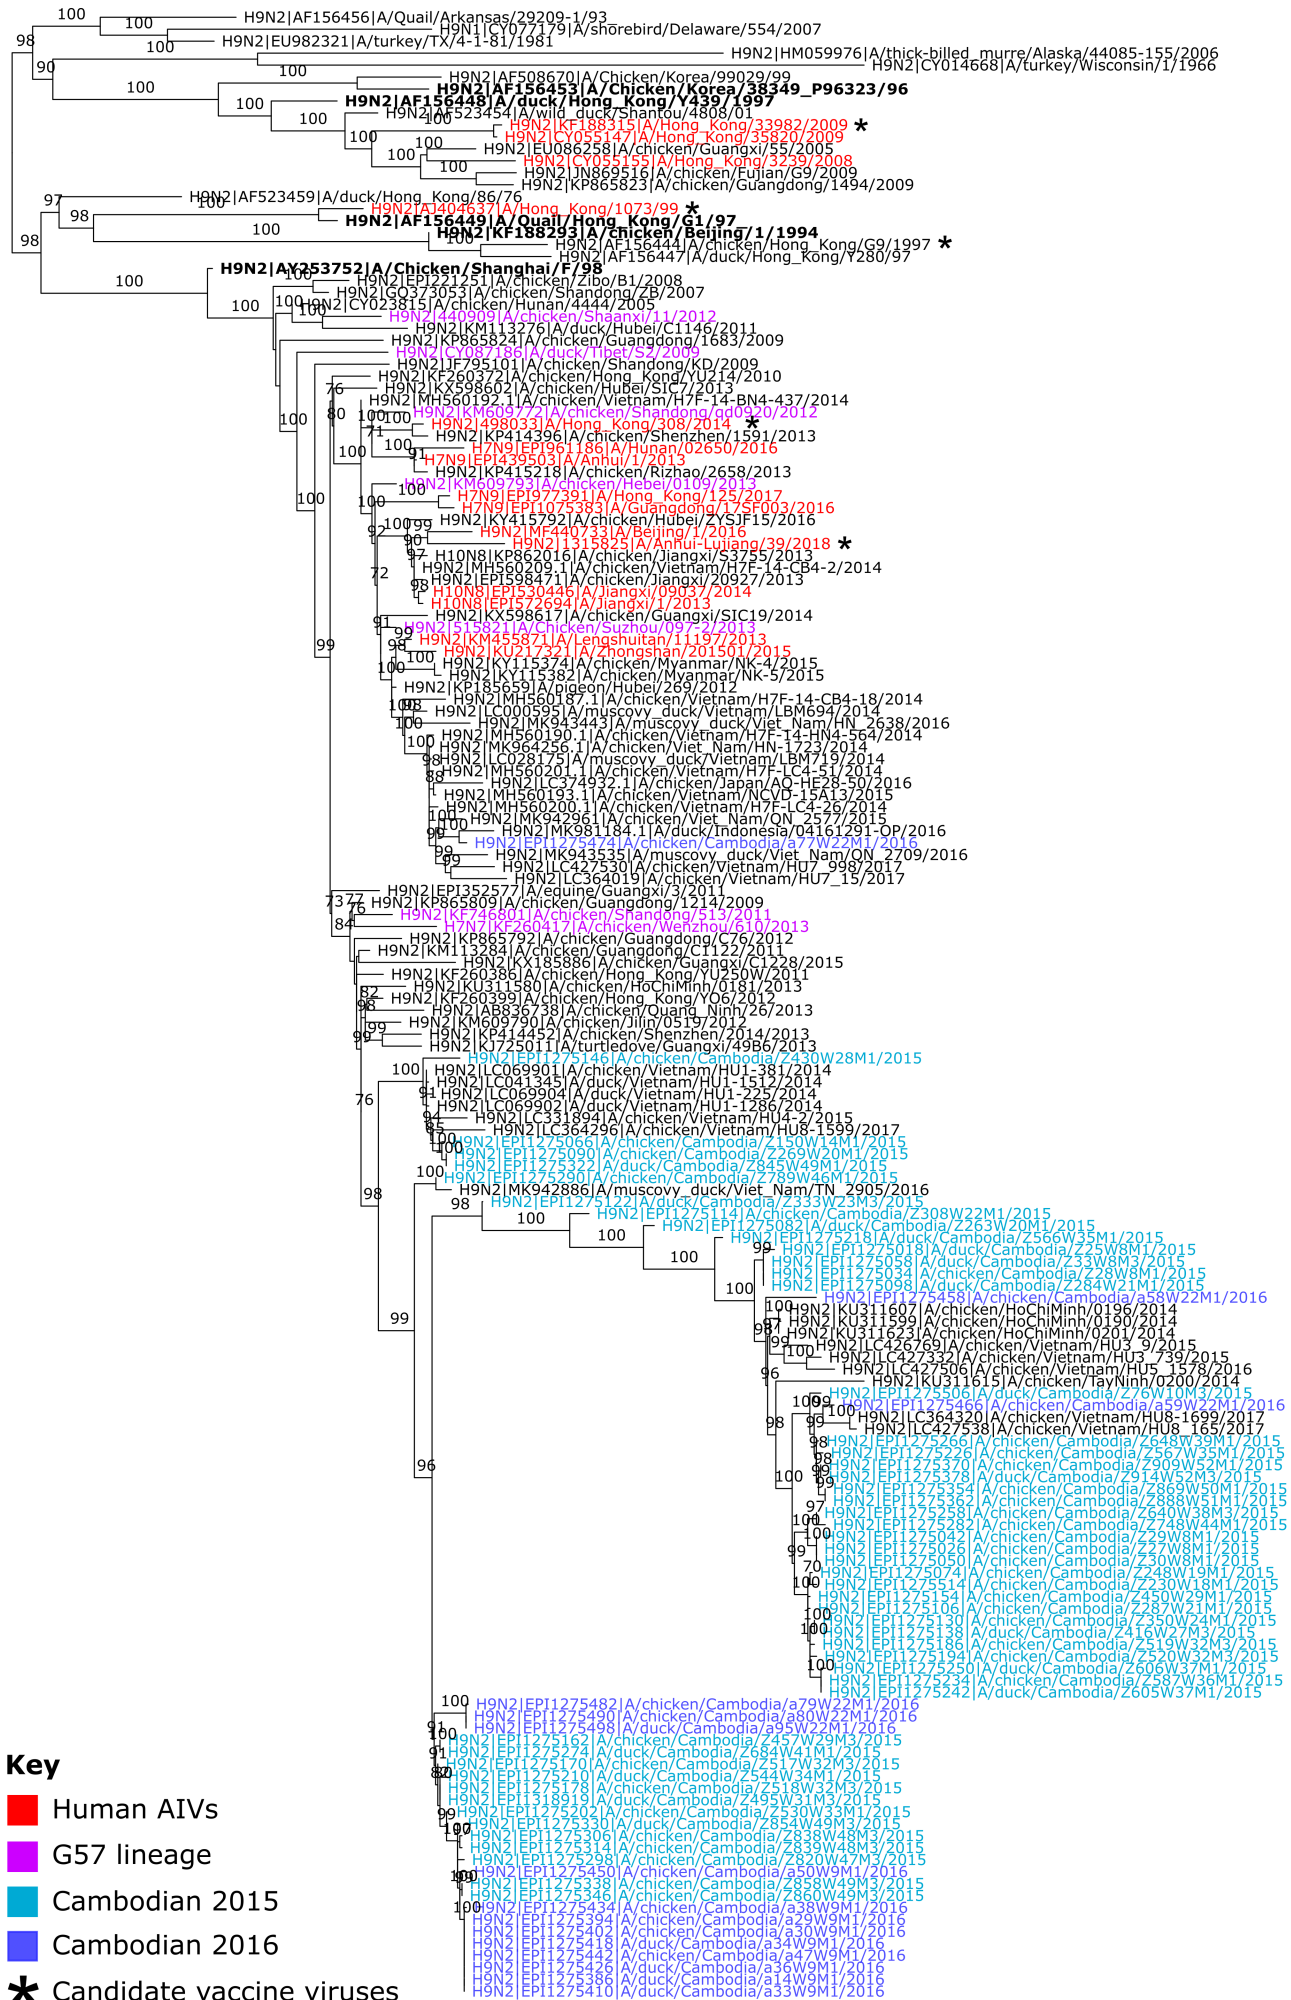

F/98

S4d) NS

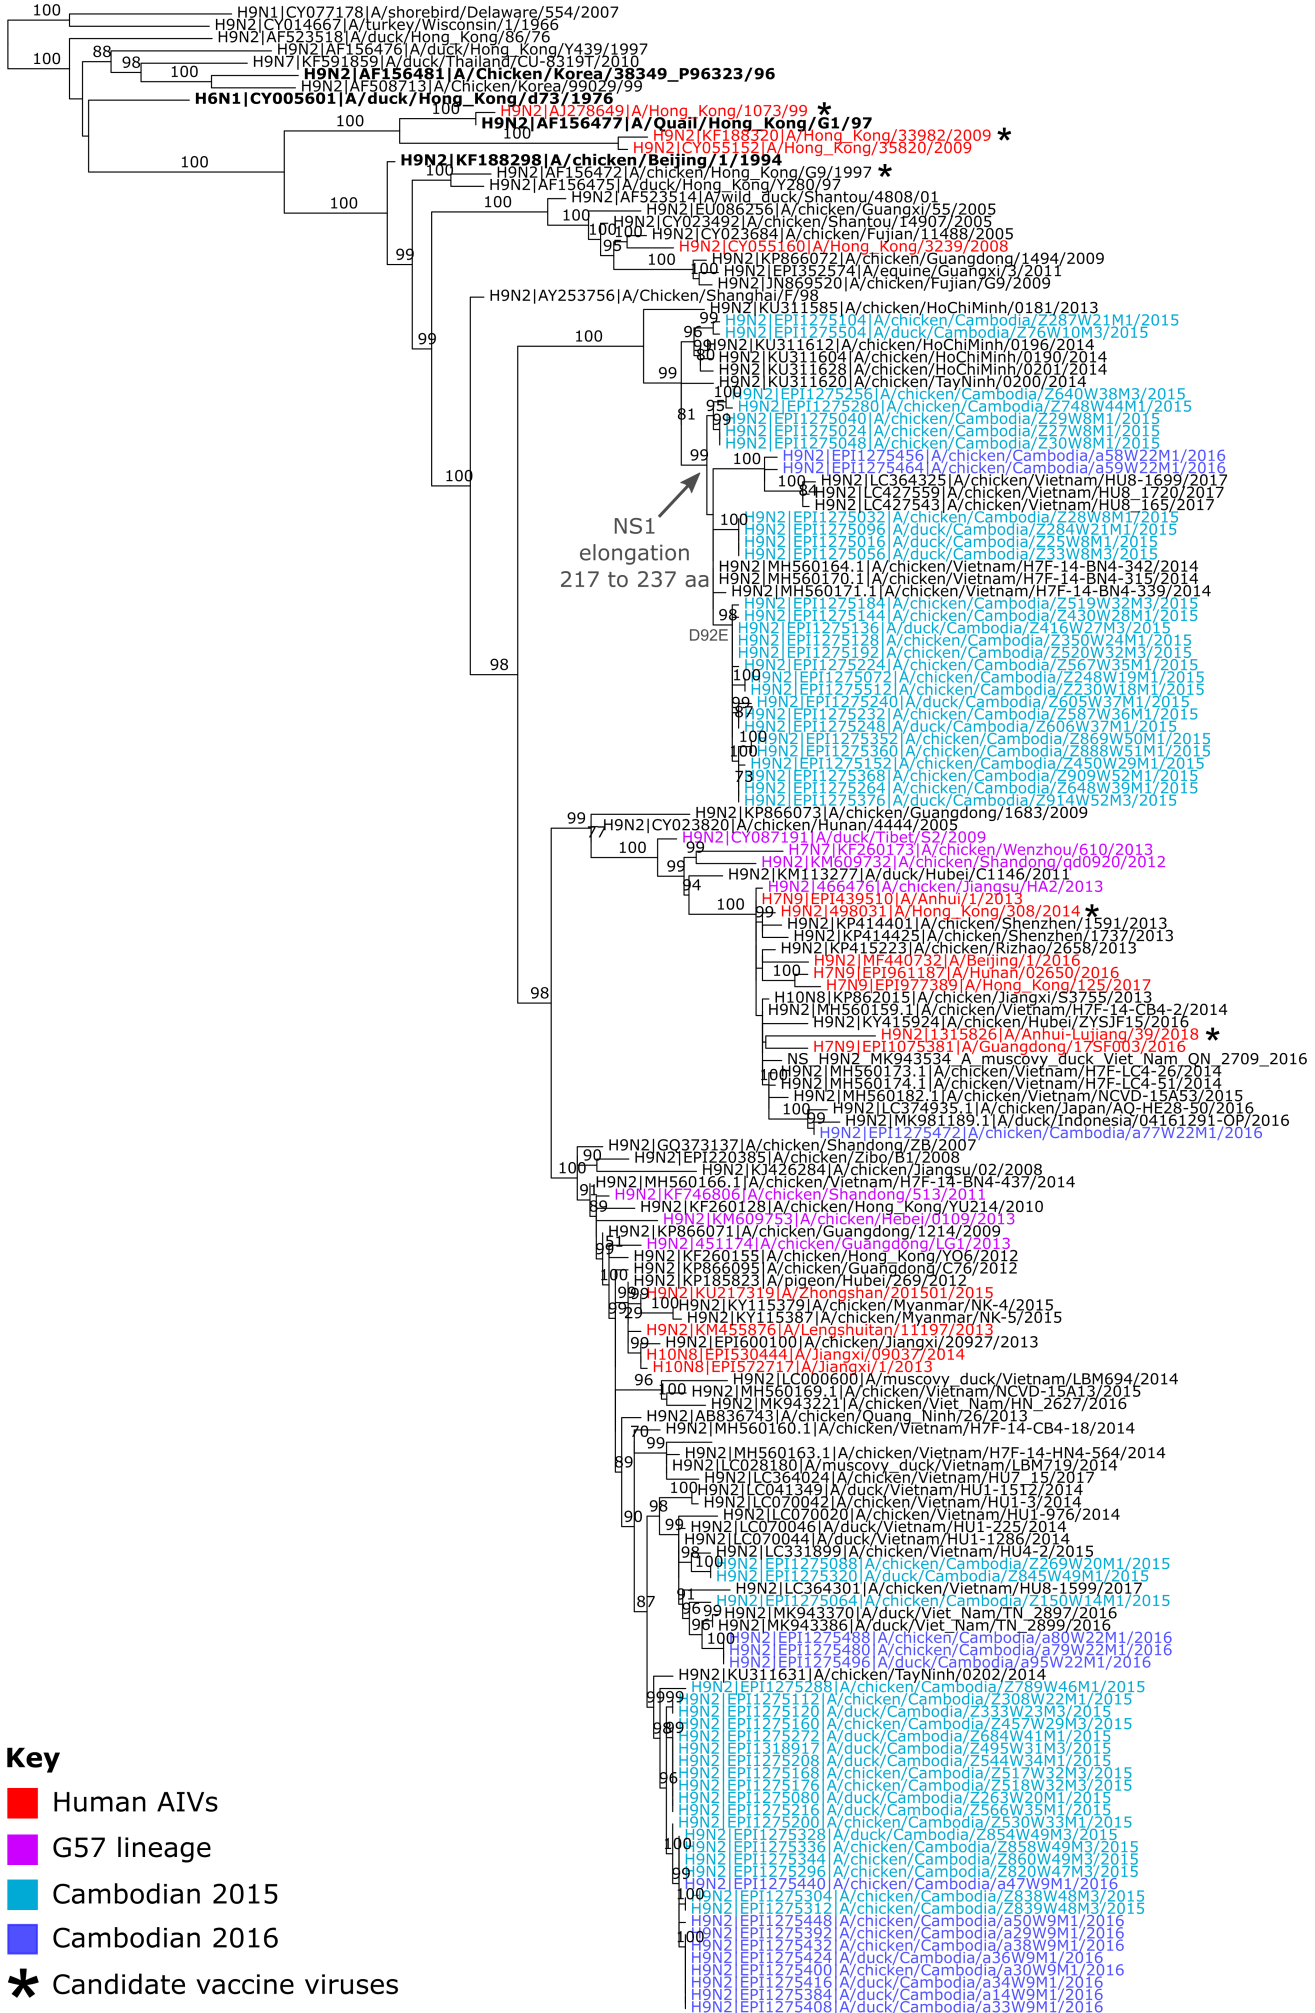

Key

- Human AIVs
- G57 lineage
- Cambodian 2015
- Cambodian 2016
- ★ Candidate vaccine viruses



S4e) MP

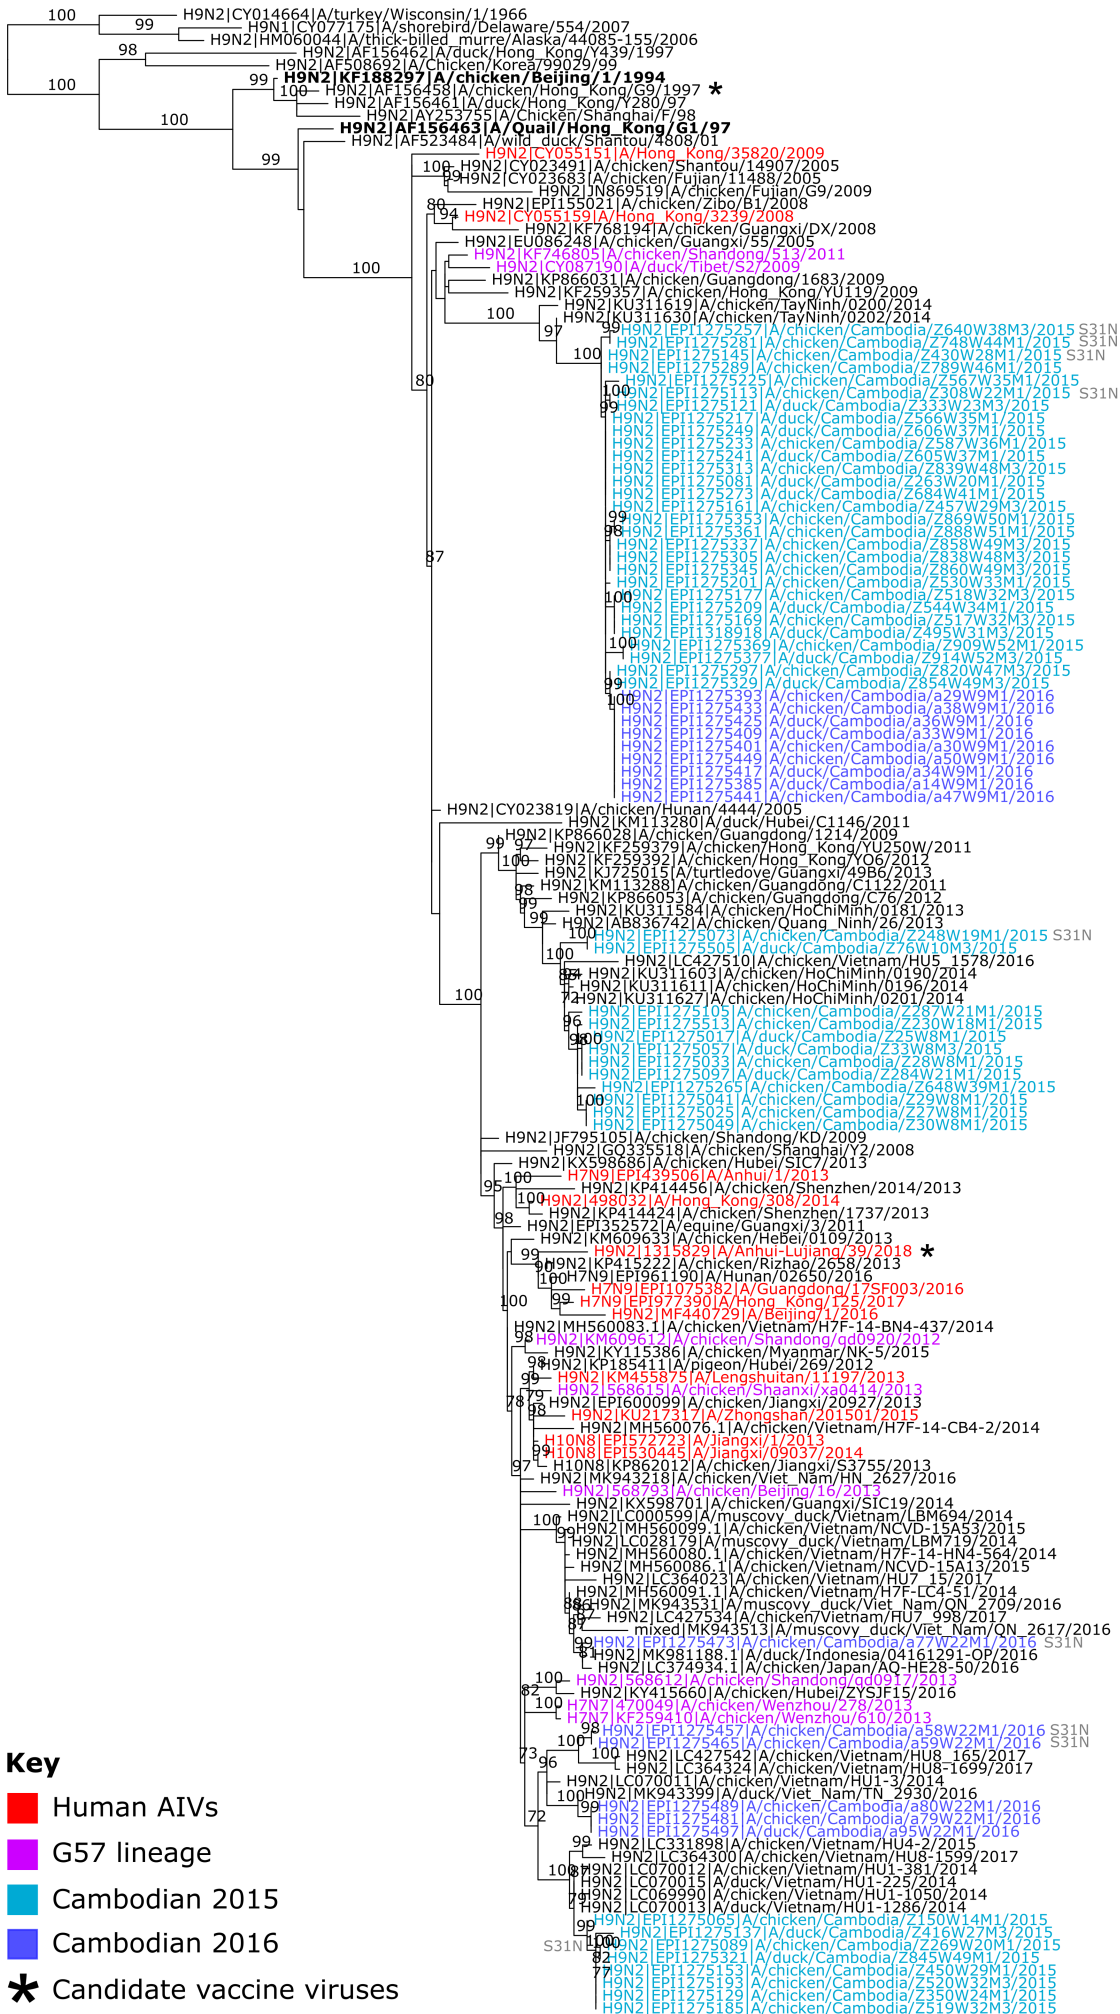

G1/97

Key

- Human AIVs
- G57 lineage
- Cambodian 2015
- Cambodian 2016
- ★ Candidate vaccine viruses

S4f) NP

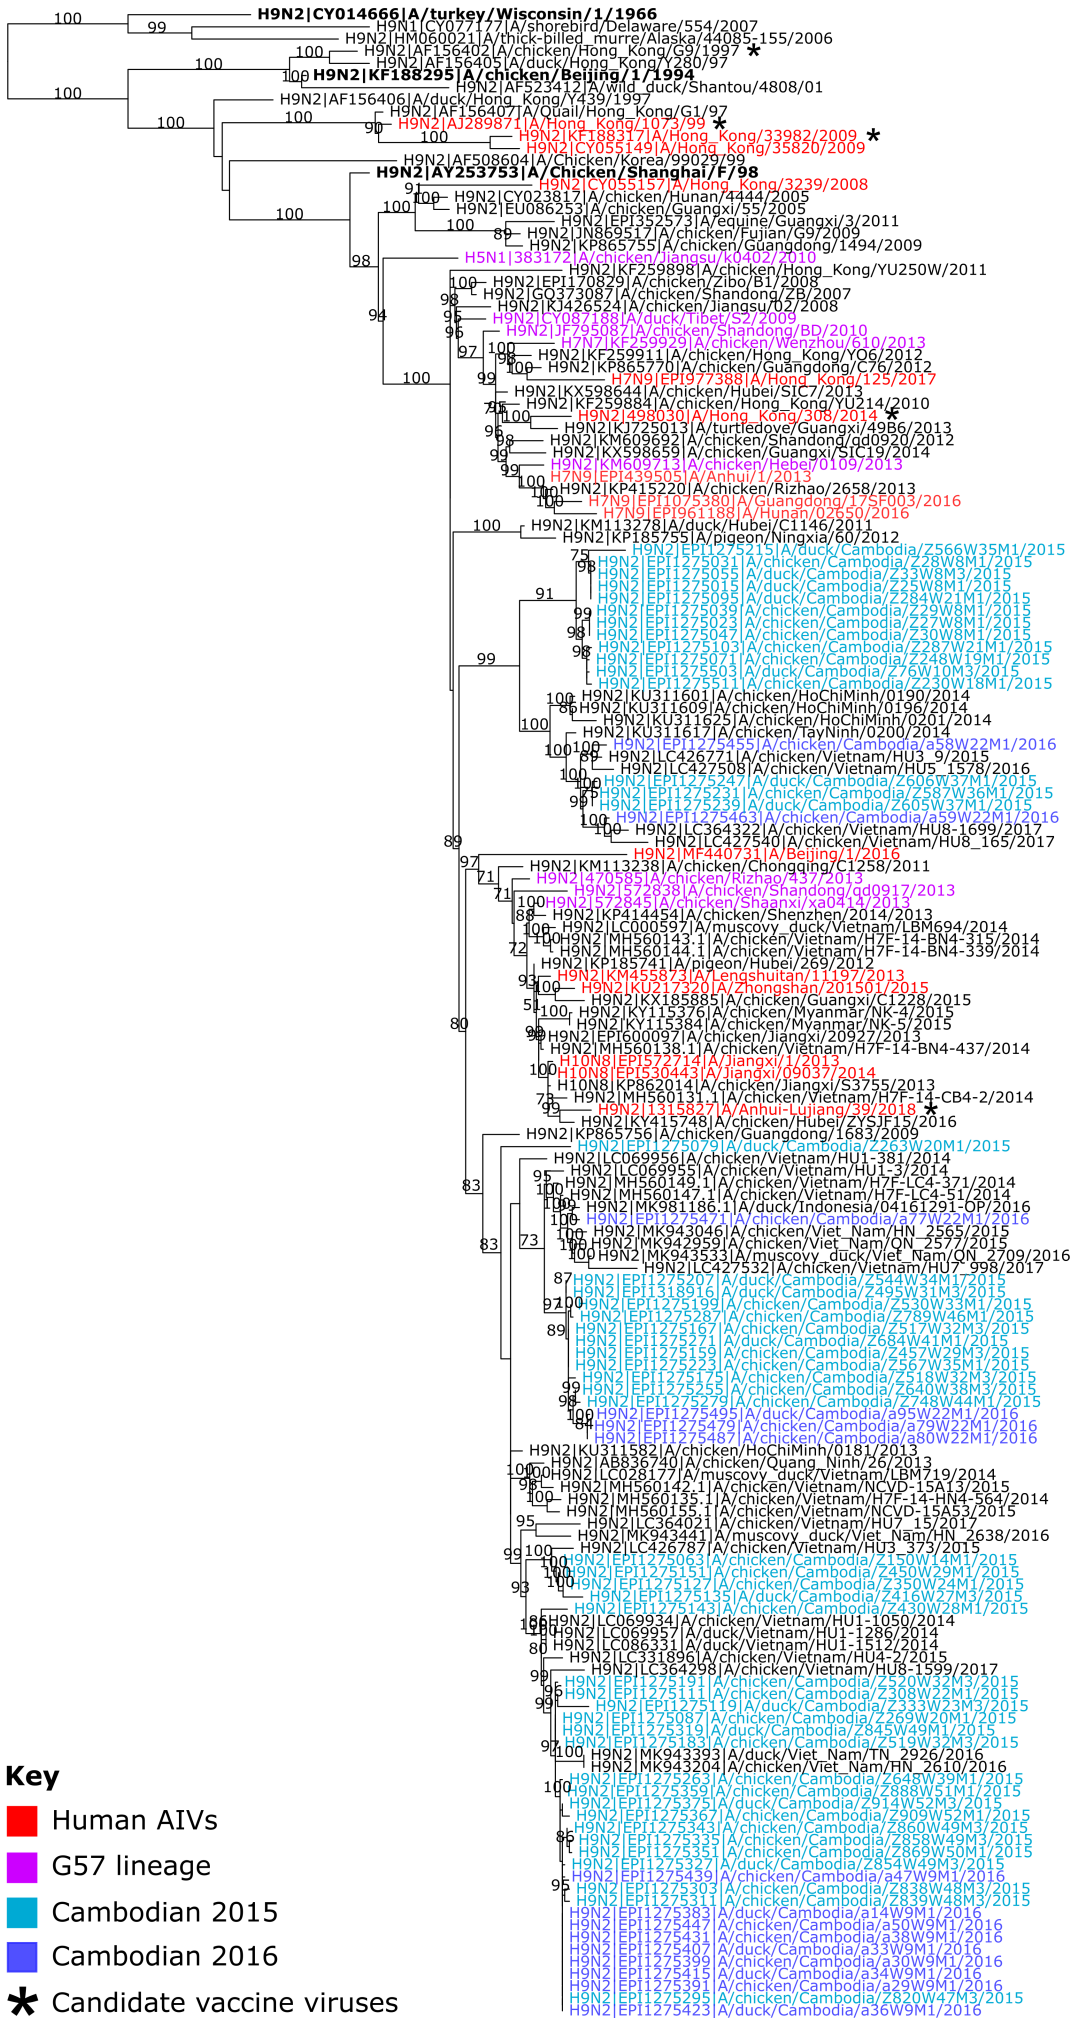

F/98

Key

- Human AIVs
- G57 lineage
- Cambodian 2015
- Cambodian 2016
- ✱ Candidate vaccine viruses
